# Supplementary material for: Comprehensive analysis of disulfidptosis-related lncRNAs for predicting prognosis and response of immunotherapy in pancreatic adenocarcinoma
Source: PubMed Central journal article supplement — Transl Cancer Res. 2024 Mar 27;13(3):1336–50. doi: 10.21037/tcr-23-1706 (PMC11009799; doi:10.21037/tcr-23-1706), 2024-03-27
Supplement: tcr-13-03-1336-prf.pdf [file tcr-13-03-1336-prf.pdf]

## Peer Review File

Article information: <https://dx.doi.org/10.21037/tcr-23-1706>

### Reviewer A

**Comment: Your work is definitely of significant importance to the subject of pancreatic ductal adenocarcinoma treatment. Minor revisions of English usage are needed to improve cohesion and overall understanding of your study.**

Reply: We tried our best to improve the manuscript and made some changes to the manuscript. These changes will not influence the content and framework of the paper. And here we did not list the changes but marked in red in the revised paper. We appreciate for Reviewers' warm work earnestly and hope that the correction will meet with approval.

### Reviewer B

**Comment 1: The three affiliations listed for authors are the same.**

Reply: We were really sorry for our careless mistakes. Thank you for your reminder.

Changes in the text: see Page 1, line 6

**Comment 2: ROC should be defined upon first use in the Abstract**

Reply: We feel sorry for our carelessness. In our resubmitted manuscript, "ROC" have been defined.

Changes in the text: see Page 1, line37

**Comment 3:"The study of Li et al. found that the disulfidptosis -related genes, SLC7A11 and LRPPRC,..." "Lin et al. found that AL031722.1 may be associated with the prognosis of lower-grade gliomas(28)." The author names and the references cited in the above sentences are not matched.**

Reply: We feel sorry for our carelessness.

Changes in the text: see Page3, line 86-88; Page7, line 318-320

**Comment 4:"Previous studies have found that TM4SF1-AS1 contributes to tumorigenesis by inducing stress granule formation and inhibiting apoptosis(25)." "Recent studies have found that cells with high expression of SLC7A11, under glucose starvation, abnormally accumulate intracellular disulfide bonds such as cystine, which affects the binding between cytoskeletal proteins, leading to the collapse of the cytoskeletal protein network and rapid cell death(8)."**

**Studies were mentioned in the above sentences, but only one reference is cited. Please confirm whether more references are needed.**

Reply: We feel sorry for our carelessness.

Changes in the text: see Page3, line 81; Page7, line 313

Comment 5:

**LncRNA/PAAD/DRlncRNAs/TCGA/LASSO/GSEA/HR/CI/cAMP/MAPK/AUC should be defined on first use in the Main Text and use abbreviated forms afterwards.**

Reply: According to your suggestion,

LncRNA/PAAD/DRlncRNAs/TCGA/LASSO/GSEA/HR/CI/cAMP/MAPK/AUC have been defined on first use in the Main Text.

Changes in the text: see Page 3, line 92; Page 3, line 108; Page 3, line 123; Page 3, line 117; Page 4, line 132; Page 4, line 170; Page 6, line 236; Page 6, line 237; Page 6, line 253; Page 6, line 254; Page 6, line 239

Comment 6: **Genes/in vitro/in vivo should be italicized in the entire article.**

Reply: According to your suggestion, Genes/in vitro/in vivo have been italicized in the entire article.

Changes in the text: see Page 7, line 289; Page 7, line 295; Page 7, line 289.

Comment 7: **Please unify the use of “validation or test” sets in the entire article including table/figure**

Reply: We feel sorry for our carelessness. In our resubmitted manuscript, we unify the use of “validation ” sets in the entire article including table/figure

Comment 8: **“multivariate HR = 1.167, 95% CI = 1.102-1.236, p < 0.01) (Figures 4A,B).”**

**Please check the accuracy of the value marked in BOLD in the above sentence and ensure its consistency with the figure.**

Reply: Thanks for your suggestions. We feel sorry for our carelessness.

Changes in the text: see Page 6, line 236-238

Comment 9: **All the abbreviations in the figure(s) and table(s) should be defined in the explanatory legend.**

Reply: We have defined all the abbreviations in the figure(s) and in the table in the explanatory legend.

Changes in the text: see Page 11, line 488-52

Comment 10: **Table 1**

**\*A header is required in the first column.**

**\*Replace “unknown” with “unknown”.**

Reply: Thank you. Due to our carelessness, there were mistakes in Table 1, and the right table was replaced.

Changes in the text: Newly submitted Table 1.

Comment 11: **Figure 1C**

**\*Explain dashed lines in the legend.**

**\*A higher resolution is needed.**

**\*The numbers are on top of each other.**

Reply: Thanks for your suggestions. Due to our carelessness, there were mistakes in Figure 1, and the right figure was replaced. There are no dash lines in Figure 1C.

Changes in the text: Newly submitted Figure 1.

Comment 12: **Figure 2**

**\*Provide subfigure C with higher resolution.**

**\*Explain dashed lines in subfigure E in the legend.**

**\*Subfigure AB have the same K-M curves and risk scores. Please confirm.”**

Reply: Thanks for your suggestions. We have Explain dashed lines in subfigure E in the legend and replace the Figure 2.

Changes in the text: Newly submitted Figure 2. see Page 11, line 497-498

Comment 13: **Figure 3**

**\*Review the stage reported in subfigure H.**

**\*Provide subfigure I with higher resolution.**

Reply: Thanks for your suggestions. The right figure was replaced

Changes in the text: Newly submitted Figure 3

Comment 14: **Figure 4**

**\*Replace “pvalue/riskScore” with “p value/risk score”.**

**\*Explain \*\*\* in the legend.**

**\*Review “pr( futime )” and remove extra spaces.**

Reply: Thanks for your suggestions. We have Explain dashed lines in subfigure 4 in the legend and replace the Figure 4.

Changes in the text: see Page 11, line 506; Newly submitted Figure 4

Comment 15: **Figure 5**

**\*Replace “qvalue” with “q value”**

Reply: Thanks for your suggestions. The right figure was replaced.

Changes in the text: Newly submitted Figure 5

Comment 16: **Figure 6**

**\*Explain both values - 0.046/0.012 in the figure.**

**\*"StromalScore/ImmueScore/ESTIMATEScore", a space is needed between the first word and Score.**

Reply: Thanks for your suggestions. The right figure was replaced. Both values - 0.046/0.012 are less than 0.05.  $p < 0.05$  differences were statistically significant.

Changes in the text: Newly submitted Figure 6

Comment 17: **Figure 7**

**\*Subfigure A was cut off on the left.**

**\*Explain dashed lines in the legend.**

Reply: We were really sorry for our careless mistakes. Thank you for your reminder. The right figure was replaced. We removed the dashed line in Figure 7.

Changes in the text: Newly submitted Figure 7
